# Supplementary material for: Role of graphene on the band structure and interfacial interaction of Bi2WO6/graphene composites with enhanced photocatalytic oxidation of NO
Source: Royal Society of Chemistry journal article supplement (doi:10.1039/c4ta03762f), 2014-01-01
Supplement: c4ta03762f1.pdf [file c4ta03762f1.pdf]

## Supporting Information

### **Role of graphene on the band structure and interfacial interaction of Bi<sub>2</sub>WO<sub>6</sub>/graphene composites with enhanced photocatalytic oxidation of NO**

*Ying Zhou<sup>a,b)</sup>\**, *Xiaojing Zhang<sup>b)</sup>*, *Qian Zhang<sup>b)</sup>*, *Fan Dong<sup>c)</sup>\**, *Fang Wang<sup>b)</sup>*, and *Zhuo Xiong<sup>b)</sup>*

<sup>a)</sup> State Key Laboratory of Oil and Gas Reservoir and Exploitation, Southwest Petroleum University, Chengdu 610500, China

<sup>b)</sup> School of Materials Science and Engineering, Southwest Petroleum University, Chengdu 610500, China

<sup>c)</sup> College of Environmental and Biological Engineering, Chongqing Technology and Business University, Chongqing 400067, China

\*To whom correspondence should be addressed

Tel: + 86 28 83037411; Fax: +86 28 83037406

Email: [yzhou@swpu.edu.cn](mailto:yzhou@swpu.edu.cn) (Y. Zhou); [dfctbu@126.com](mailto:dfctbu@126.com) (F. Dong)

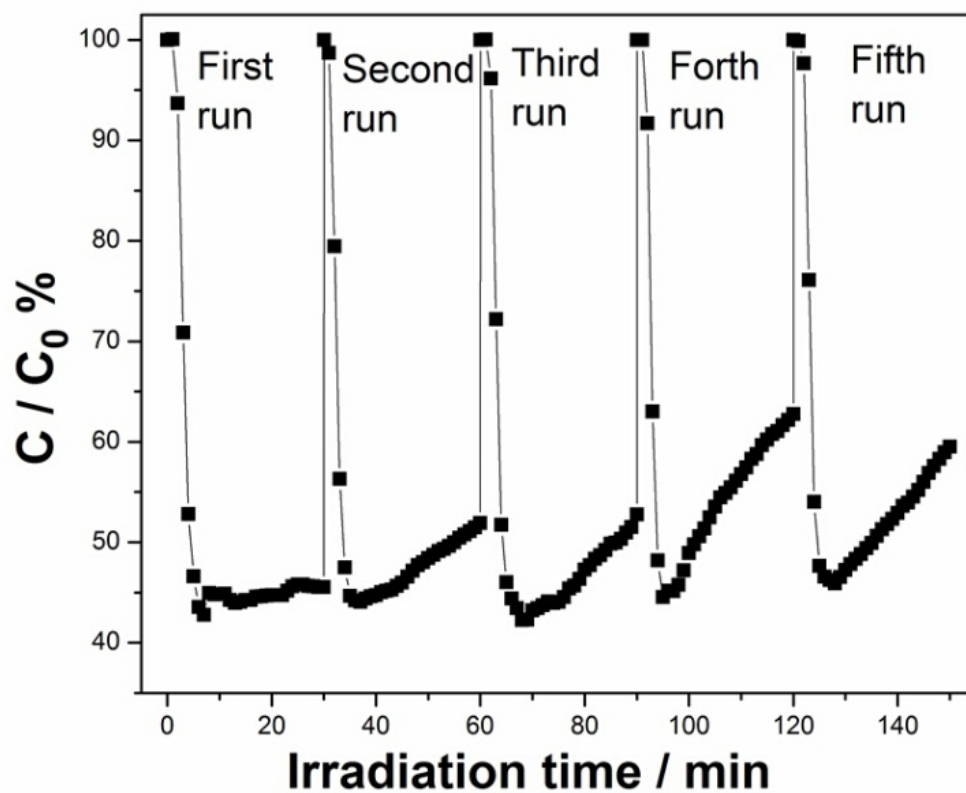

**Figure S1.** Cycling runs of photocatalytic activities of  $\text{Bi}_2\text{WO}_6/\text{graphene}$  under UV-vis light irradiation for removal of NO in air.

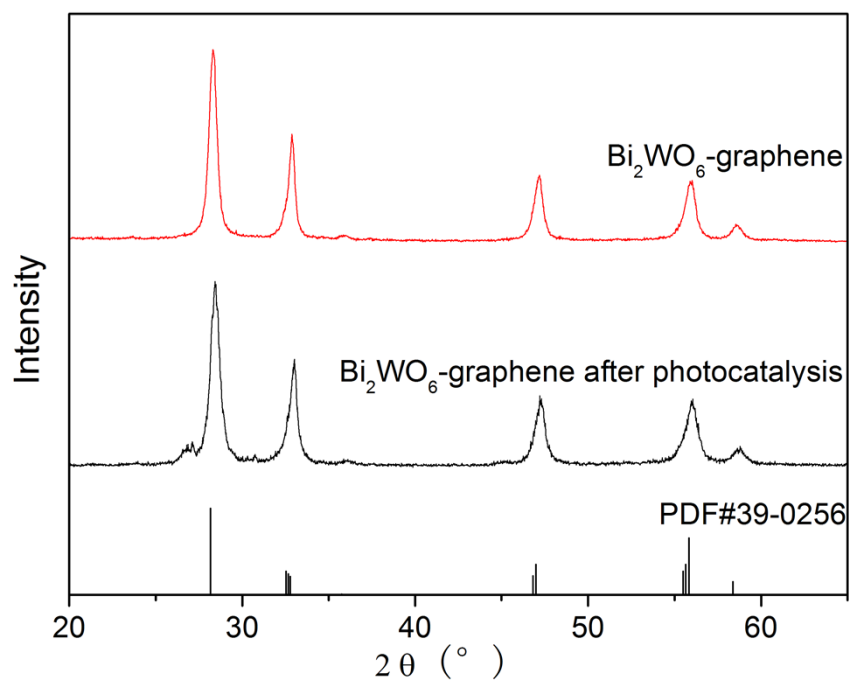

**Figure S2.** XRD patterns of  $\text{Bi}_2\text{WO}_6/\text{graphene}$  before and after cycling photocatalytic tests

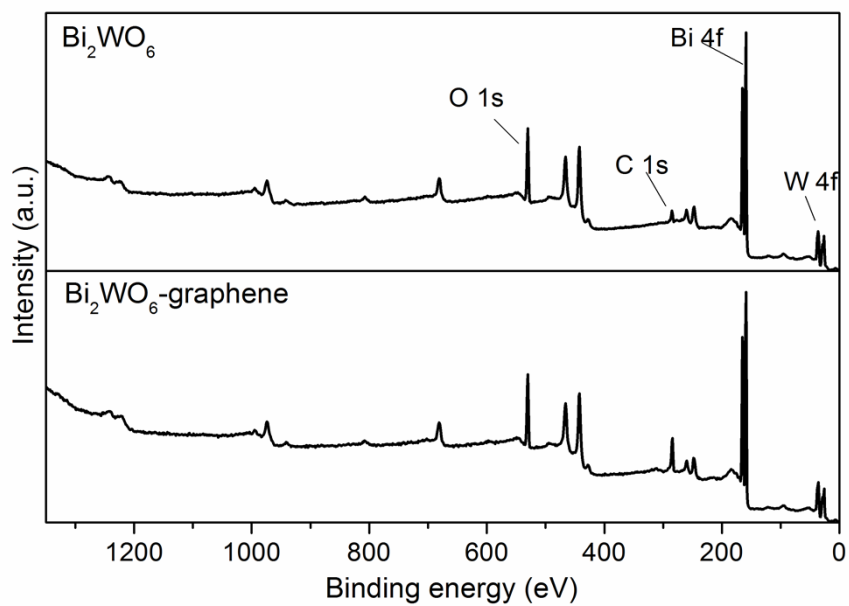

**Figure S3.** XPS spectra of  $\text{Bi}_2\text{WO}_6$  and  $\text{Bi}_2\text{WO}_6/\text{graphene}$

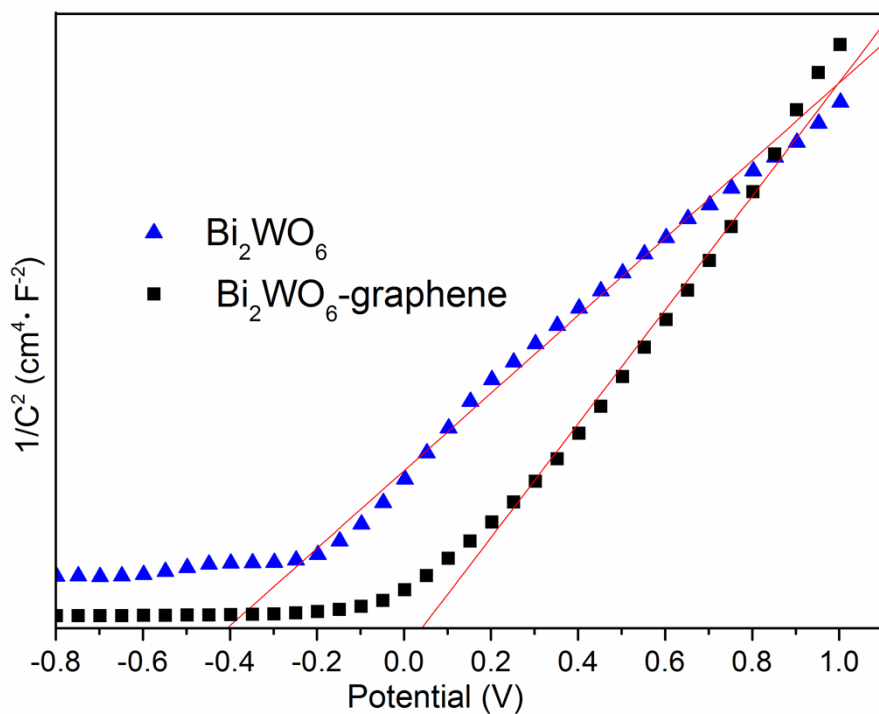

**Figure S4.** Mott-Schottky (MS) plots of  $\text{Bi}_2\text{WO}_6$  and  $\text{Bi}_2\text{WO}_6/\text{graphene}$

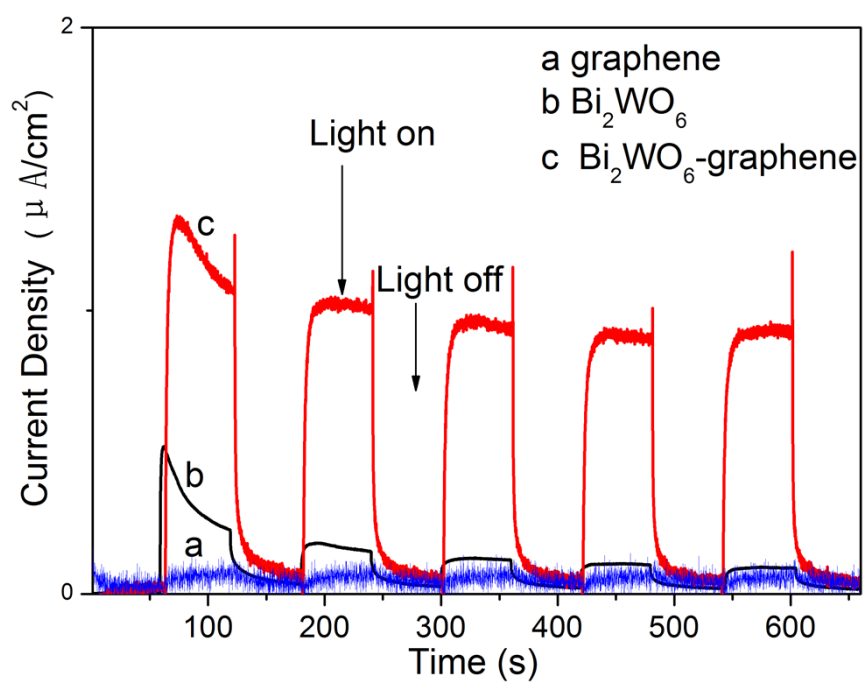

**Figure S5.** Photocurrent density of  $\text{Bi}_2\text{WO}_6$ , graphene and  $\text{Bi}_2\text{WO}_6$ /graphene under ultraviolet-visible light irradiation (with wavelength from 378 to 550nm)

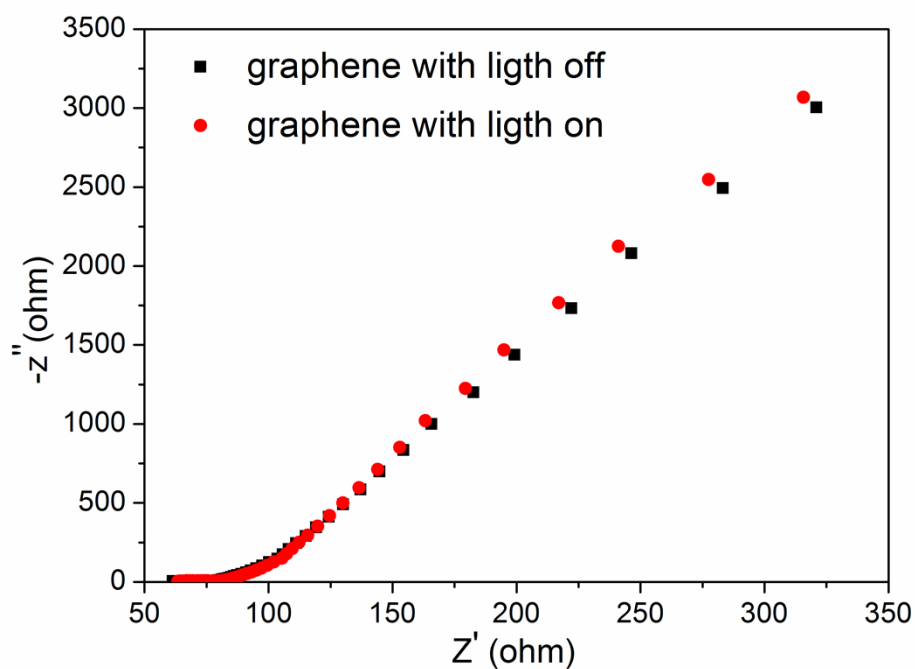

**Figure S6.** EIS spectra of graphene in the darkness and under light irradiation.

**Table S1** The value of fitting circuit

|                           | Bi <sub>2</sub> WO <sub>6</sub> | Bi <sub>2</sub> WO <sub>6</sub> /graphene |
|---------------------------|---------------------------------|-------------------------------------------|
| Conduction band (NHE. eV) | -0.04                           | 0.30                                      |

**Table S2** The potential of conduction-band bottom of Bi<sub>2</sub>WO<sub>6</sub> and Bi<sub>2</sub>WO<sub>6</sub>/graphene through MS plots

|        | Bi <sub>2</sub> WO <sub>6</sub> with<br>light off | Bi <sub>2</sub> WO <sub>6</sub> with<br>light on | Bi <sub>2</sub> WO <sub>6</sub> /graphene<br>with light off | Bi <sub>2</sub> WO <sub>6</sub> /graphene<br>with light on |
|--------|---------------------------------------------------|--------------------------------------------------|-------------------------------------------------------------|------------------------------------------------------------|
| R1     | 28.87                                             | 28.38                                            | 24.64                                                       | 23.54                                                      |
| R2     | 6.121                                             | 6.436                                            | 9.647                                                       | 10.42                                                      |
| C1     | 2.1035E-07                                        | 1.8639E-07                                       | 6.4404E-08                                                  | 5.5267E-08                                                 |
| R3     | 15191                                             | 19010                                            | 29.75                                                       | 28.4                                                       |
| CPE1-T | 0.00011019                                        | 5.6055E-05                                       | 5.0356E-05                                                  | 4.6673E-05                                                 |
| CPE1-P | 0.83322                                           | 0.87774                                          | 0.84197                                                     | 0.85596                                                    |
| R4     | 2.9837E17                                         | 1.1901E06                                        | 2.2209E05                                                   | 1.2516E05                                                  |
| CPE2-T | 1.265E-05                                         | 1.4287E-05                                       | 0.00023664                                                  | 0.00024107                                                 |
| CPE2-P | 0.99607                                           | 1.003                                            | 0.97036                                                     | 0.96343                                                    |

R1: the resistance of the solution;

R2: the resistance of the counter electrode; C1: the capacitance of the counter electrode

R3: the resistance of work electrode(BWO or BWO-G); CPE1-T/CPE1-P: the deviation of constant phase angle (the value is close to 1 representing a trend to fabricate a double-layer electric)

R4: the resistance of the reaction
